# Supplementary material
Source: PubMed Central journal article supplement (PMC7968784)
Supplement: 14-01326.pdf [file 14-01326.pdf]

**On-line Table: Summary of characteristics of enrolled studies**

| Author                              | Article Type              | Cohort    | Subject No. | HH Grade<br>(I/II/III/IV/V) | Antiplatelet Administration Method               |
|-------------------------------------|---------------------------|-----------|-------------|-----------------------------|--------------------------------------------------|
| Benitez et al 2004 <sup>13</sup>    | Retrospective case series | UIA + R/A | 16          | 7/0/5/3/1                   | Preprocedure loading                             |
| Katsaridis et al 2006 <sup>23</sup> | Retrospective case series | UIA + R/A | 33          | I-III: 23, IV-V: 10         | Postprocedure loading                            |
| Biondi et al 2007 <sup>14</sup>     | Prospective registry      | UIA + R/A | 5           | WFNS 1/1/2/1/0 <sup>a</sup> | Intraprocedural aspirin + postprocedure dual     |
| Juzskat et al 2007 <sup>22</sup>    | Retrospective case series | UIA + R/A | 16          | NA                          | Intraprocedural aspirin + postprocedure dual     |
| Kim 2007 <sup>25</sup>              | Retrospective case series | R/A       | 45          | 5/22/10/6/2                 | Postprocedure loading                            |
| Jankowitz et al 2008 <sup>21</sup>  | Retrospective case series | R/A       | 40          | 6/3/13/16/2                 | Intraprocedural eptifibatide IV                  |
| Kim et al 2008 <sup>24</sup>        | Retrospective case series | UIA + R/A | 50          | 6/11/8/16/9                 | Intraprocedural eptifibatide IV                  |
| Huang et al 2009 <sup>20</sup>      | Retrospective case series | R/A       | 21          | NA                          | Preprocedure                                     |
| Klisch et al 2009 <sup>26</sup>     | Retrospective case series | UIA + R/A | 7           | 3/2/1/1/0                   | Postprocedure                                    |
| Sedat et al 2009 <sup>30</sup>      | Retrospective case series | UIA + R/A | 6           | 5/0/0/1/0                   | Intraprocedural aspirin + postprocedure dual     |
| Tähtinen et al 2009 <sup>31</sup>   | Retrospective case series | UIA + R/A | 61          | I-II: 29, III: 15, IV-V: 17 | Intraprocedural aspirin + postprocedure dual     |
| Piotin et al 2010 <sup>29</sup>     | Retrospective case series | R/A       | 35          | NA                          | Preprocedure loading                             |
| Taylor et al 2010 <sup>7</sup>      | Retrospective case series | R/A       | 42          | 11/14/8/8/1                 | Postprocedure loading                            |
| Yang et al 2010 <sup>40</sup>       | Retrospective case series | UIA + R/A | 10          | 4/5/0/1/0                   | Preprocedure loading                             |
| Yun and Cho 2010 <sup>34</sup>      | Retrospective case series | R/A       | 11          | 1/6/2/2/0                   | Intraprocedural aspirin + postprocedure dual     |
| Gao et al 2011 <sup>19</sup>        | Retrospective case series | UIA + R/A | 129         | 39/46/34/7/7/3              | Preprocedure loading                             |
| Lodi et al 2012 <sup>28</sup>       | Retrospective case series | R/A       | 22          | 11/3/4/4/0                  | Preprocedure loading                             |
| Amenta et al 2012 <sup>12</sup>     | Retrospective case series | R/A       | 65          | 11/19/20/12/3               | Intraprocedural clopidogrel + postprocedure dual |
| Chalouhi et al 2012 <sup>9</sup>    | Prospective registry      | UIA + R/A | 30          | NA                          | Intraprocedural tirofiban IV                     |
| Fargen et al 2012 <sup>17</sup>     | Prospective registry      | UIA + R/A | 32          | NA                          | Postprocedure loading                            |
| Lee and Cho 2012 <sup>42</sup>      | Retrospective case series | UIA + R/A | 12          | 0/3/9/0/0                   | Postprocedure loading                            |
| Wakhloo et al 2012 <sup>32</sup>    | Retrospective case series | R/A       | 18          | NA                          | Preprocedure loading                             |
| Zhang et al 2012 <sup>33</sup>      | Retrospective case series | UIA + R/A | 17          | NA                          | Preprocedure loading                             |
| Chalouhi et al 2013 <sup>15</sup>   | Retrospective case series | UIA + R/A | 47          | 8/9/11/19/0                 | Intraprocedural clopidogrel + postprocedure dual |
| Clajus et al 2013 <sup>16</sup>     | Retrospective case series | UIA + R/A | 42          | 15/13/3/8/6                 | Postprocedure loading                            |
| Galal et al 2013 <sup>18</sup>      | Retrospective case series | UIA + R/A | 9           | NA                          | Intraprocedural eptifibatide IV                  |
| Lee et al 2013 <sup>27</sup>        | Retrospective case series | UIA + R/A | 20          | 3/10/4/3/0                  | Postprocedure loading                            |
| Chitale et al 2013 <sup>41</sup>    | Retrospective case series | R/A       | 44          | I-II: 13, III-V: 31         | Intraprocedural clopidogrel + postprocedure dual |
| Geyik et al 2013 <sup>36</sup>      | Retrospective case series | UIA + R/A | 70          | NA                          | Intraprocedural tirofiban IV                     |
| Huang et al 2013 <sup>37</sup>      | Retrospective case series | R/A       | 27          | 13/6/4/4/0                  | Preprocedure loading                             |
| Zhao et al 2013 <sup>38</sup>       | Retrospective case series | R/A       | 17          | 8/3/4/2/0                   | Preprocedure loading                             |
| Li and Li 2013 <sup>39</sup>        | Retrospective case series | R/A       | 19          | 5/6/6/2/0                   | Preprocedure loading                             |
| Chung 2014 <sup>35</sup>            | Retrospective case series | R/A       | 72          | NA                          | Intraprocedural loading                          |

**Note:**—NA indicates not applicable; WFNS, World Federation of Neurological Surgeons; HH, Hunt and Hess.

<sup>a</sup> Listed numbers are the order of WFNS grade I, II, III, IV, and V.
